# Supplementary material
Source: Royal Society of Chemistry journal article supplement (doi:10.1039/d6ay00751a)
Supplement: d6ay00751a1.pdf [file d6ay00751a1.pdf]

## Supporting Information

### **Acetone-Triggered Self-Assembly of L-Cysteine-Capped Copper Nanoclusters: A Robust “Assembly-to-Disassembly” Strategy for Cyanide Sensing**

Zhenpeng Chen<sup>a</sup>, Wenqing Zhang<sup>a</sup>, Fuliang Song<sup>a</sup>, Lei Hu<sup>b</sup>, Chun Kan<sup>a\*</sup>

<sup>a</sup> *Department of Chemistry and Material Science, College of Science, Nanjing Forestry*

*University, 159 Longpan Road, Nanjing 210037, PR China*

<sup>b</sup> *Key Laboratory of Integrated Regulation and Resource Development on Shallow Lake of Ministry of Education, College of Environment, Hohai University, Nanjing 210098, China*

\* Corresponding author: Chun Kan

*E-mail address:* kanchun@njfu.edu.cn.

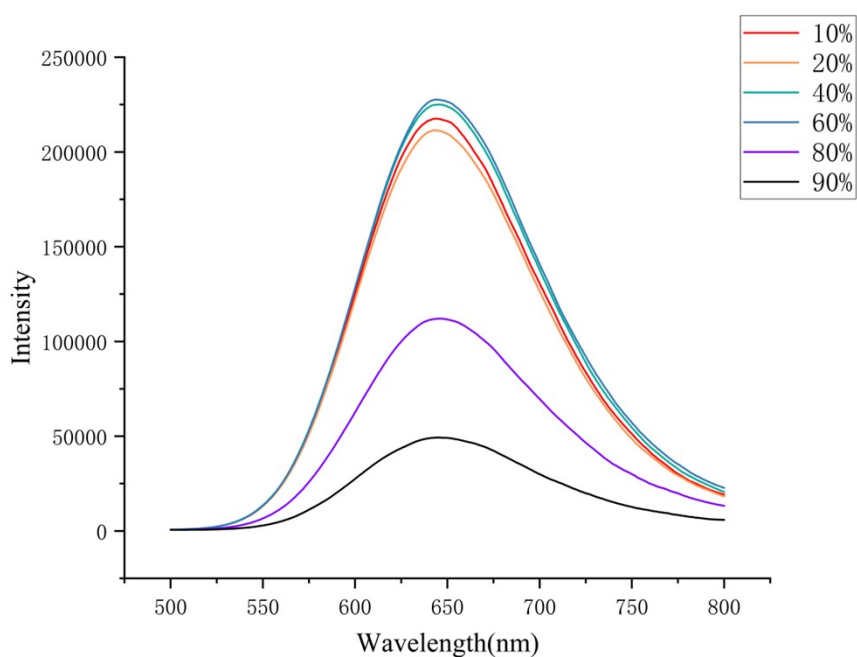

Figure S1. Fluorescence intensity of L-cys-CuNCs/AC at different solvent volume ratios.

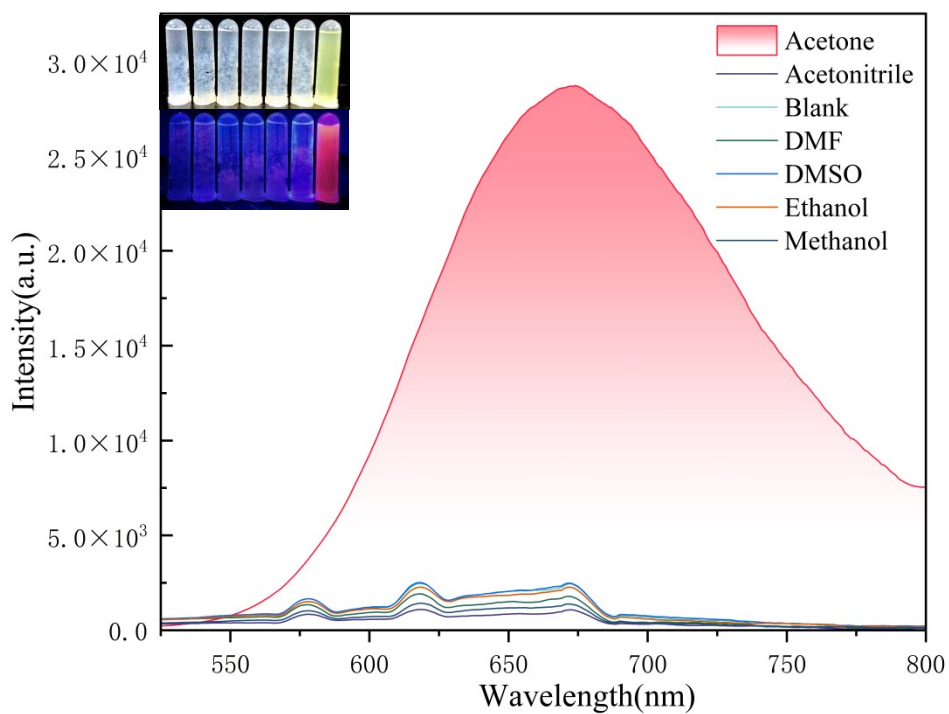

Figure S2. Fluorescence intensity of self-assembled L-cysteine-capped copper nanoclusters in the presence of different organic solvents.

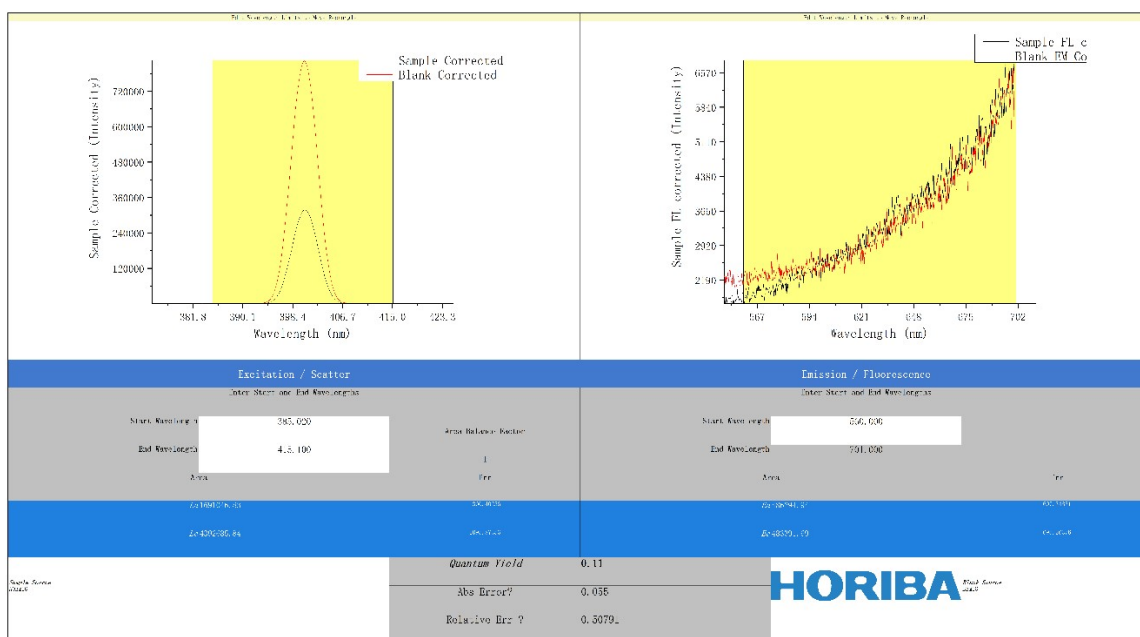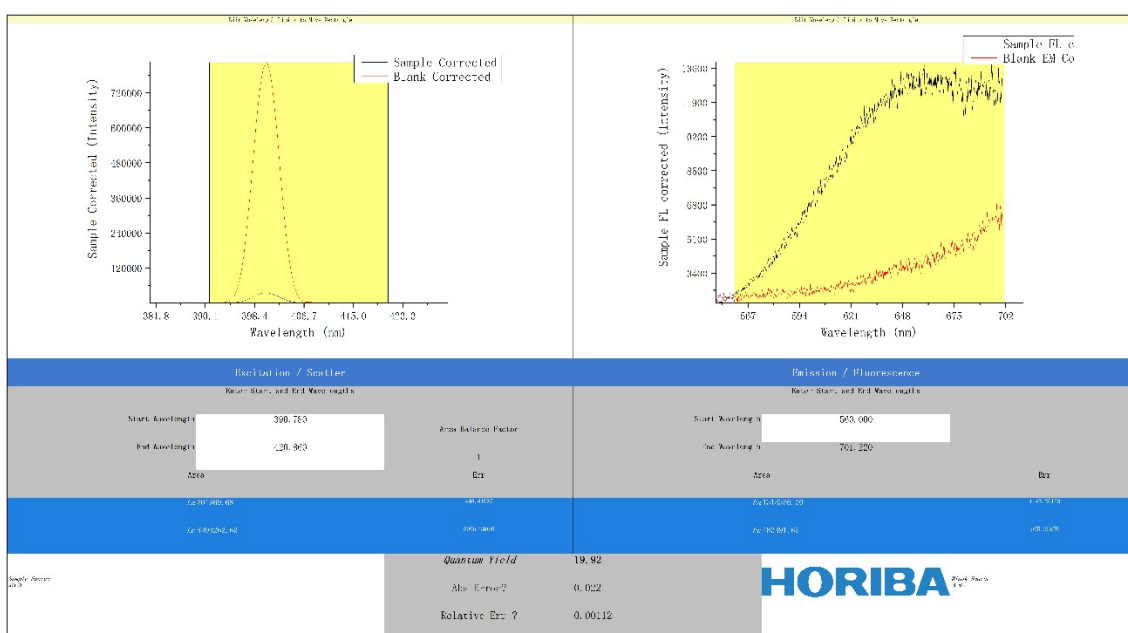

Figure S3. Quantum yields of precursor CuNCs and L-cys-CuNCs/AC assemblies.

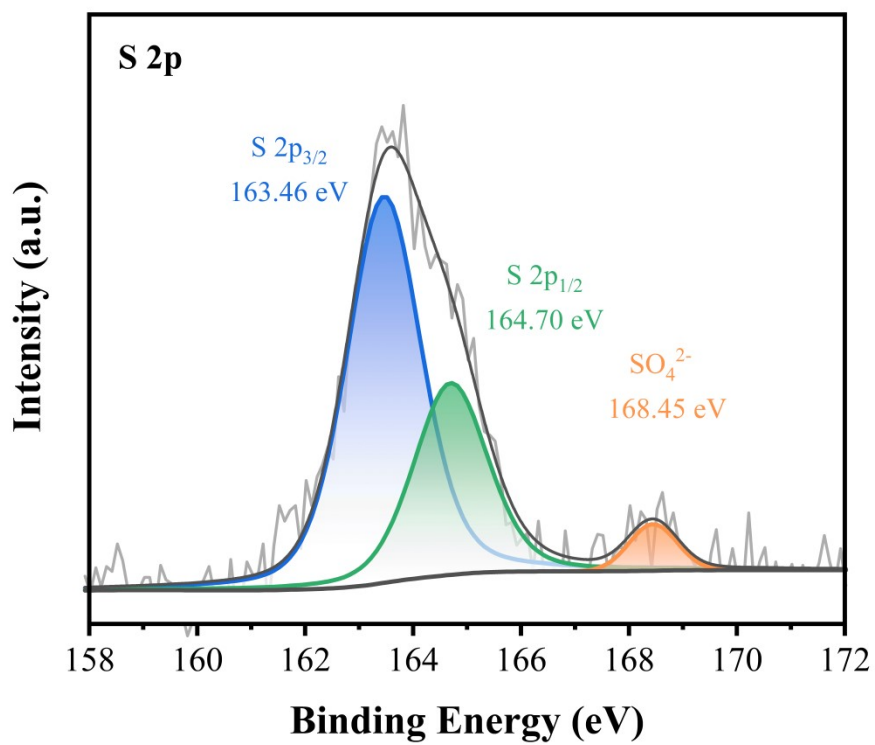

Figure S4. XPS spectrum of S 2p in L-cys-CuNCs/AC.

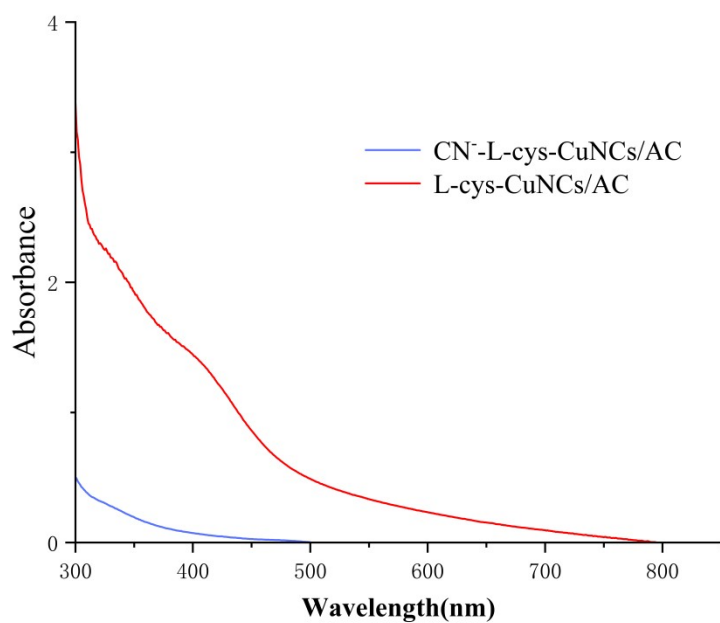

Figure S5. Shows the UV-Vis absorption spectra for the L-cys-CuNCs/AC and CN<sup>-</sup>-L-cys-CuNCs/AC

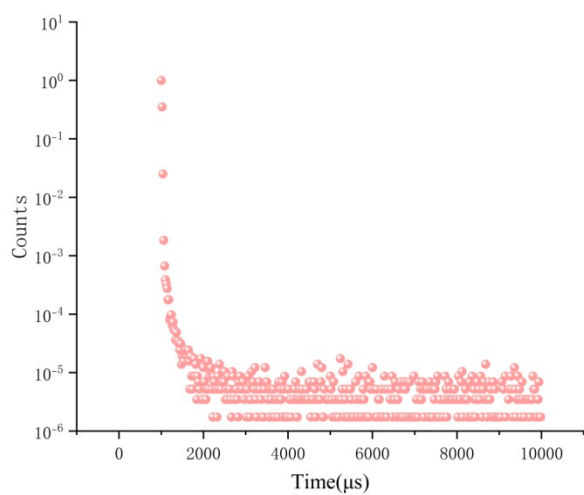

| Param          | Value/μs | Std. Dev./μs | Param  | Value        | Std. Dev.   | Rel.% |
|----------------|----------|--------------|--------|--------------|-------------|-------|
| $\tau_1$       | 7.4653   | 0.0231       | B1     | 2952956.0000 | 535078.5938 | 99.77 |
| $\tau_2$       | 119.9965 | 4.0862       | B2     | 424.9673     | 509.1954    | 0.23  |
| < $\tau$ > amp | 7.4815   | 0.0231       |        |              |             |       |
| < $\tau$ > int | 7.7250   | 0.0328       |        |              |             |       |
|                |          | A            | 1.6017 |              |             |       |
| $\chi^2$       | 1.2891   |              |        |              |             |       |

Figure S6. Fluorescence lifetime decays of L-cys-CuNCs/AC assemblies
